# Supplementary material
Source: PubMed Central journal article supplement (PMC2714389)
Supplement: jn.108.103309_1.pdf [file jn.108.103309_1.pdf]

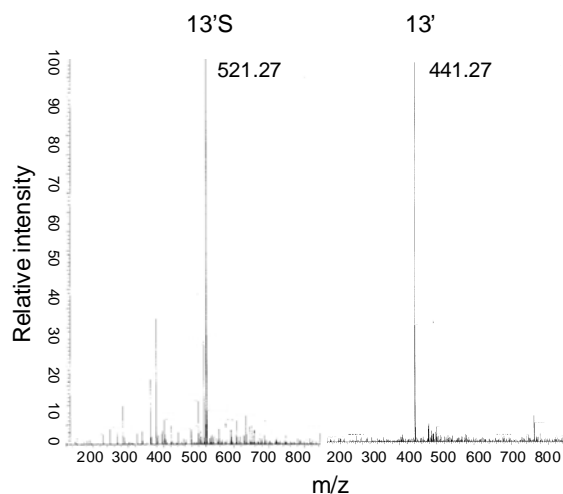

**Supplemental Figure 1** shows mass spectra of the metabolites eluted at 22.7 and 33.1 min, which are identified as the  $\gamma$ -TE metabolites, i.e., 13'S and 13'-COOH, respectively.

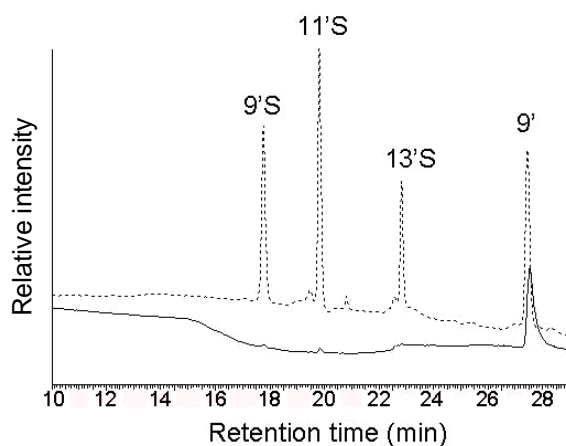

**Supplemental Figure 2** shows the relative response of the metabolites to electrochemical oxidation (Lower trace in solid line), compared with the signal of fluorescent detection (Upper trace in dash line). Metabolites from  $\gamma$ -TE extracted from cell-culture media were separated by HPLC, and detected by fluorescent detection (excitation and emission wavelength were set at 292 and 327 nm, respectively), followed by coulometric detection at 450 mV using a Model of 5011 analytical cell.
